# Supplementary material for: Simple and efficient non-doped deep-blue and white organic light-emitting diode based on hybridized local and charge transfer (HLCT) materials
Source: Royal Society of Chemistry journal article supplement (doi:10.1039/d4nj01388c), 2024-01-01
Supplement: d4nj01388c1.pdf [file d4nj01388c1.pdf]

## Supporting information

### Simple and Efficient Non-doped Deep-Blue and White Organic Light-Emitting Diode Based on Hybridized Local and Charge Transfer (HLCT) Materials

Xiyu Wang<sup>a</sup>, Xiaoxia Li<sup>a</sup>, Ruihao Yang<sup>a</sup>, Huixia Xu<sup>a,\*</sup>, Baoyou Liu<sup>c</sup>, Gang Yue<sup>c</sup>, Hua Wang<sup>a</sup> and Yanqin Miao<sup>a,b,c,\*</sup>

<sup>a</sup>*Key Laboratory of Interface Science and Engineering in Advanced Materials, Ministry of Education, Taiyuan University of Technology, Taiyuan 030024, China*

<sup>b</sup>*Shanxi-Zheda Institute of Advanced Materials and Chemical Engineering, Taiyuan 030000, China*

<sup>c</sup>*Ningxia Hui Autonomous Region Screen Display Organic Materials Engineering Technology Research Center, Ningxia Sinostar Display Material Co., Ltd., Yinchuan 750003, China*

\*Corresponding E-mails: miaoyanqin@tyut.edu.cn (**Yanqin Miao**); xuhuixia@tyut.edu.cn (**Huixia Xu**)

## Section 1

All OLEDs were fabricated on pre-patterned indium tin oxide (ITO) glass substrates with a sheet resistance of  $15 \Omega \text{ sq}^{-1}$ . ITO-coated glass substrates were cleaned by ultrasonic cleaning in deionized water, acetone and isopropyl alcohol for 20 min in order, then treated with ultraviolet-ozone for 15 min. After this, the ITO substrates were leaded into a deposition chamber, and the OLEDs were fabricated through a vacuum evaporation deposition process under a pressure below  $5 \times 10^{-4}$  Pa. The deposition rates and film thicknesses were monitored by calibrated crystal quartz sensors. The deposition rates for the organic materials, LiF, MoO<sub>3</sub> and Al were 1~2, 0.3, 0.5, and 3~6  $\text{\AA s}^{-1}$ , respectively, in particular, the evaporation rate of Ph-UEMs is about 0.1  $\text{\AA s}^{-1}$ . All the devices had an active emissive area of 3 mm×3 mm, which are defined by the overlap between the ITO anode and Al cathode. The current density-voltage-luminance (J-V-L) characteristics were performed simultaneously by using a computer-controlled source meter (Keithley 2400) integrated with a BM-7A luminance meter test system. The EL spectra were recorded by a PR655 spectrometer. The EQE was calculated from the current density-voltage-luminance curves and EL spectral data.

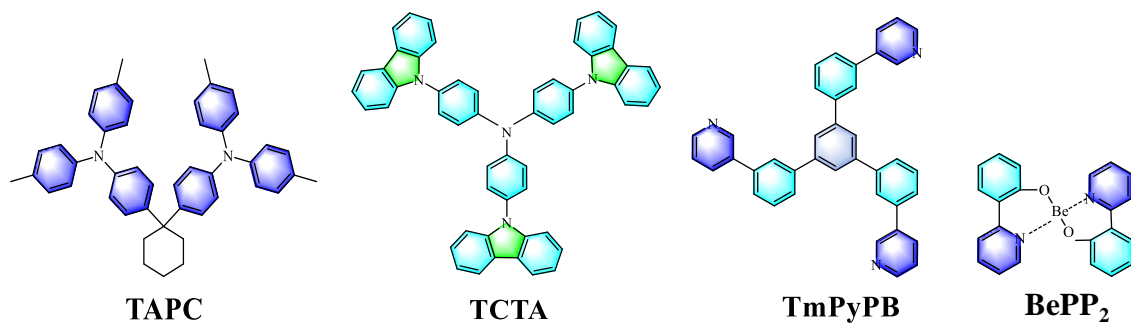

**Figure S1.** Molecular structures for all organic functional materials used in this work.

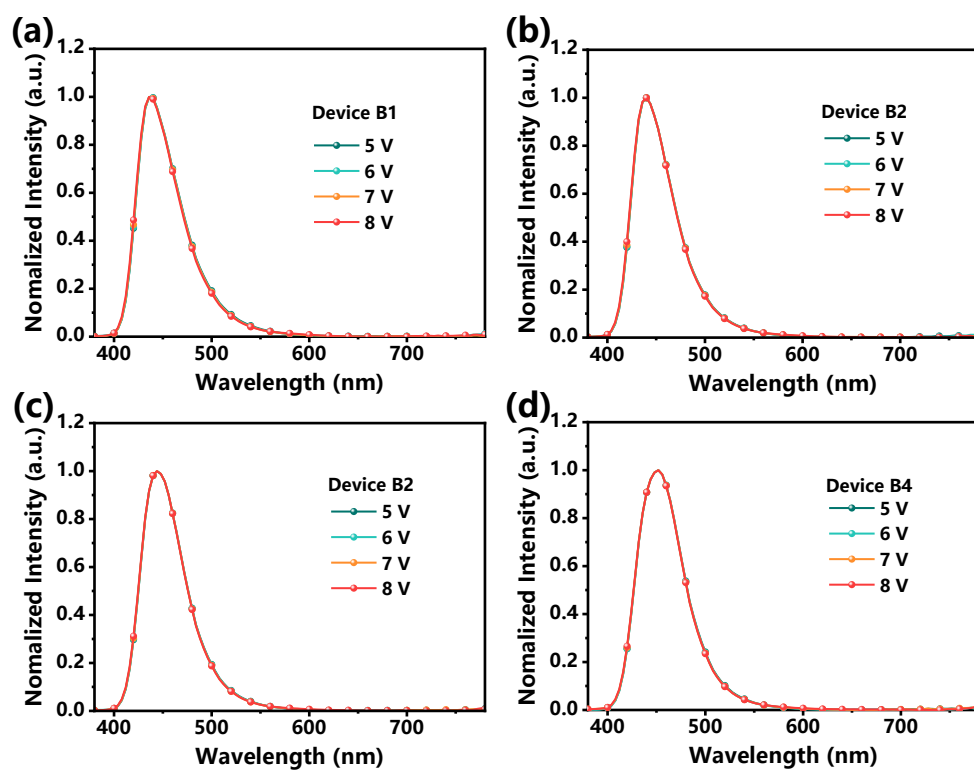

**Figure S2.** Normalized EL spectra for non-doped blue devices B1-B4 at different driving voltages from 5 V to 8

V.

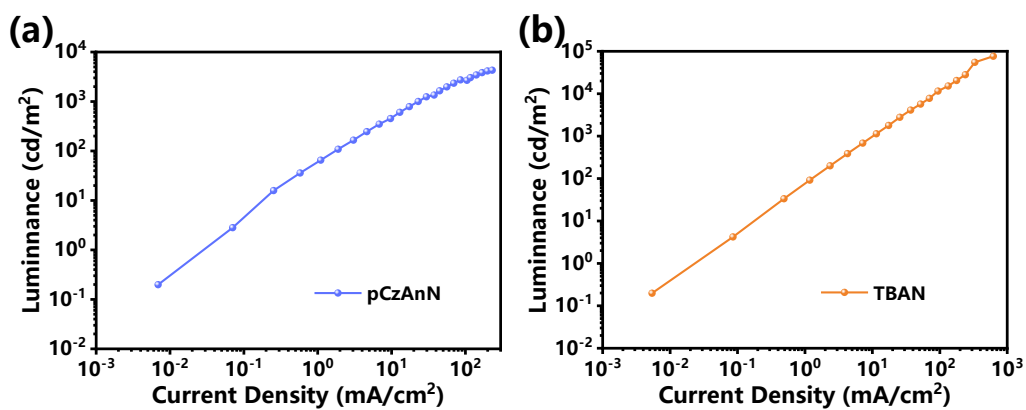

Figure S3. Linear curves of current density-luminance for pCzAnN and TBAN.

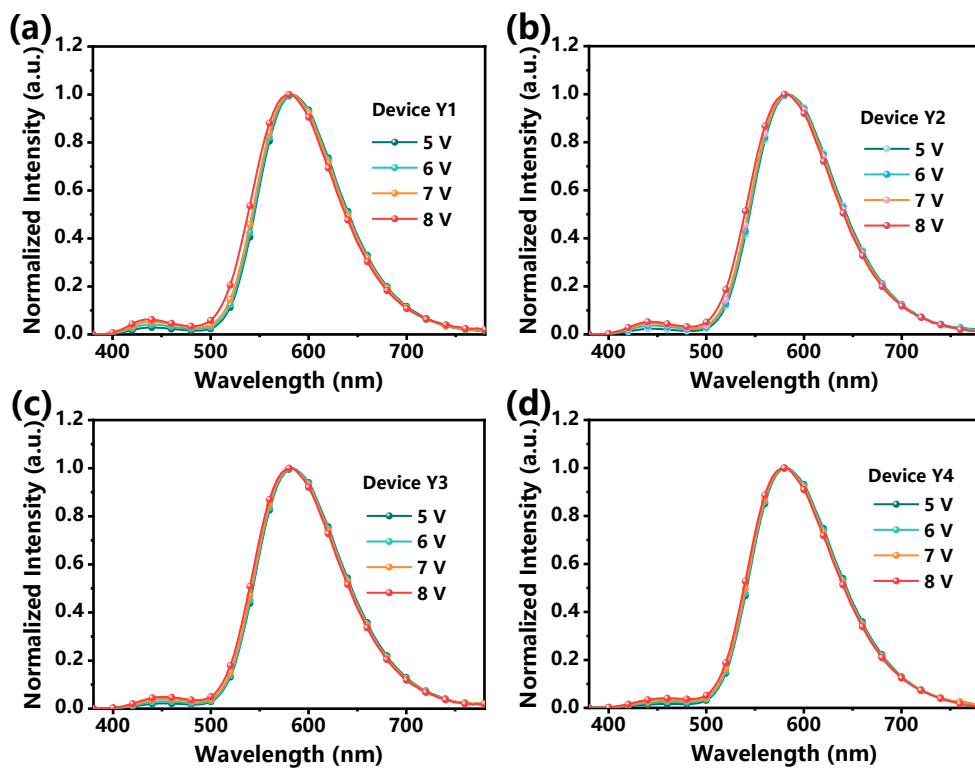

Figure S4. Normalized EL spectra for yellow devices Y1-Y4 at different driving voltages from 5 V to 8 V.

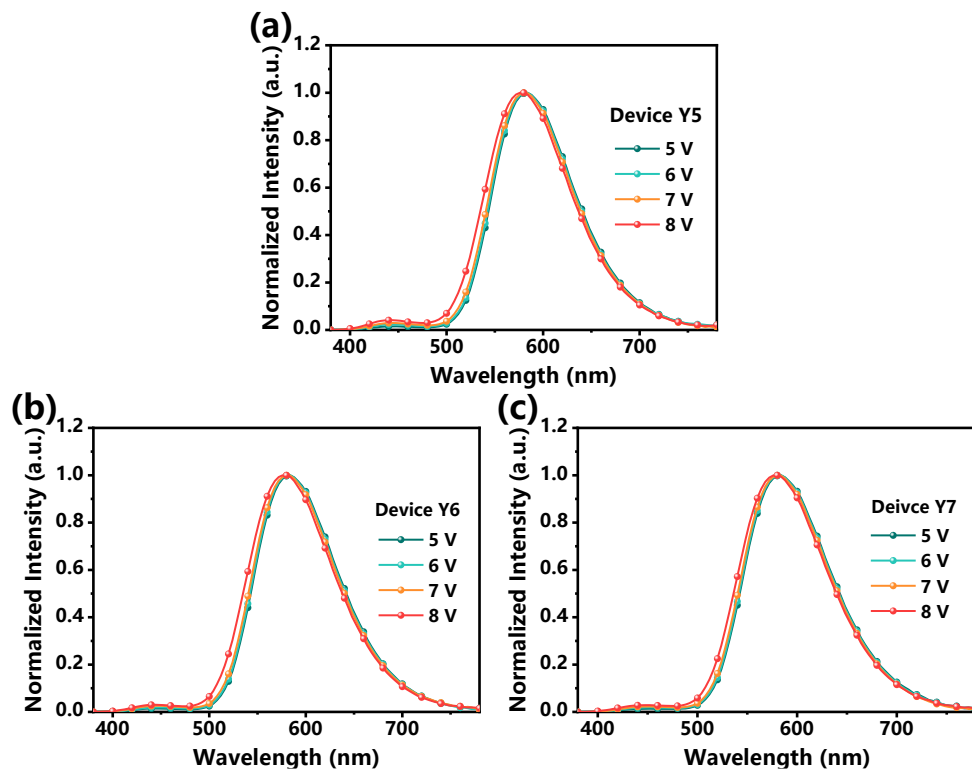

**Figure S5.** Normalized EL spectra for yellow devices Y5-Y7 at different driving voltages from 5 V to 8 V.

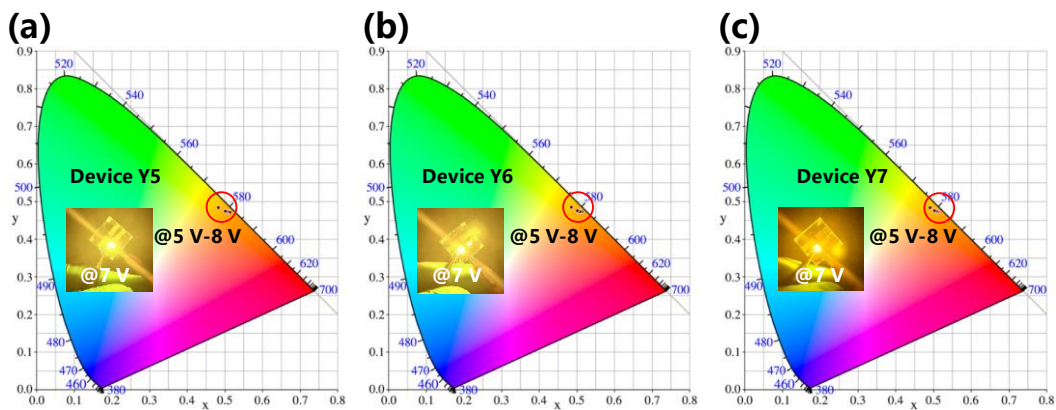

**Figure S6.** (a)-(c) CIE coordinates diagram of non-doped yellow devices Y5-7 at versus voltage and EL photo at 5 V.

V.

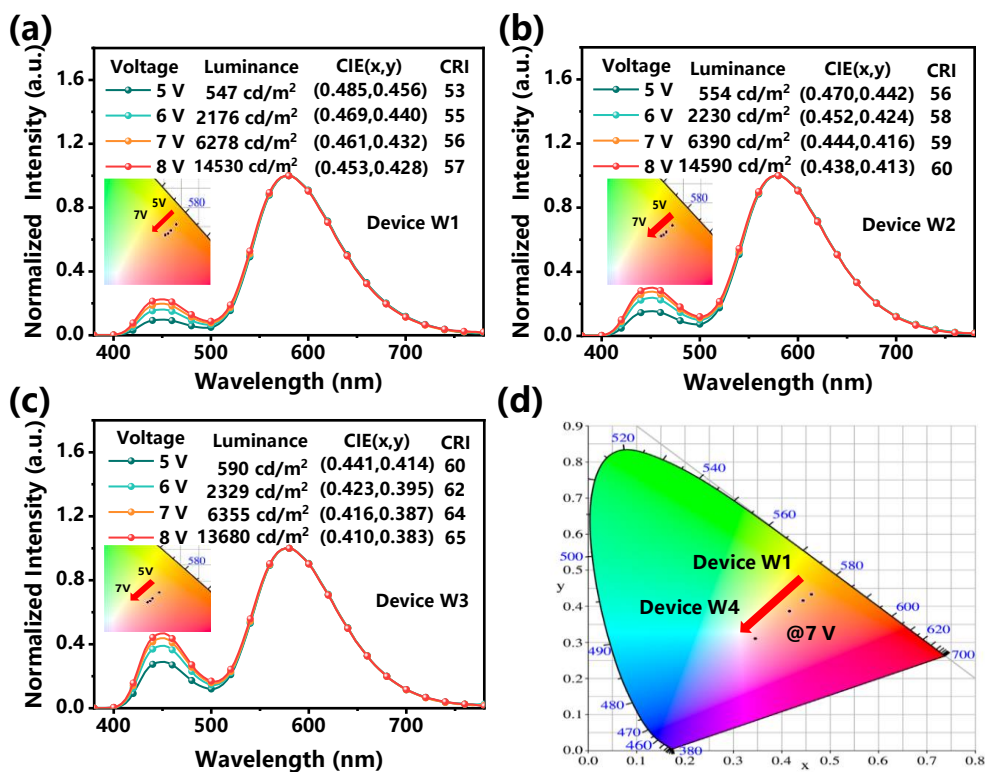

**Figure S7. (a-c)** Normalized EL spectra for white devices W1-W3 at different driving voltages from 5 V to 8 V;

(d) The CIE coordinate graph for white devices W1-W4 at a voltage of 7 V.

**Table S1** Key performance parameters of the reported non-doped non-doped blue based-HLCT OLEDs exhibiting hot excitons process with  $CIE \cong 0.08$ .

| Devices      | CE(cd/A) | EQE (%) | $\lambda_{EL}$ (cd/m <sup>2</sup> ) | CIE(x,y)       | Ref.             |
|--------------|----------|---------|-------------------------------------|----------------|------------------|
| pCzAnN       | 6.27     | 9.36    | 444                                 | (0.151,0.068)  | <b>This work</b> |
| TPATPA-CNPPi | 19.58    | 8.96    | 457                                 | (0.16,0.07)    | [24]             |
| SP           | 6.9      | 11.3    | 436                                 | (0.158, 0.068) | [25]             |
| SFCz         | 3.80     | 5.86    | 419                                 | (0.16, 0.08)   | [26]             |
| SAFpCN       | 6.54     | 4.63    | 432                                 | (0.153, 0.054) | [27]             |
| SAF-PI       | 2.90     | 4.57    | 428                                 | (0.156, 0.053) | [28]             |
| IDCz-BPSP    | 5.81     | 4.61    | 432                                 | (0.154,0.059)  | [29]             |
| PPITPh       | 7.21     | 11.83   | 436                                 | (0.15, 0.07)   | [30]             |
| PCZPBO       | 2.8      | 5.1     | 414                                 | (0.15,0.08)    | [40]             |

## Reference

24. J. Jayabharathi, S. Thilagavathy, V. Thanikachalam and J. Anudeebhana, *J. Mater. Chem. C.*, 2022, **10**, 4342-4354.
25. S. Xiao, Y. Gao, R. Wang, H. Liu, W. Li, C. Zhou, S. Xue, S. T. Zhang, B. Yang and Y. Ma, *Chem. Eng. J.*, 2022, **440**, 135911.
26. Y. Zhen, F. Zhang, H. Liu, Y. Yan, X. Li and S. Wang, *J. Mater. Chem. C.*, 2022, **10**, 9953-9960.
27. T. Sudyoasuk, S. Petdee, C. Kaiyasuan, C. Chaiwai, P. Wongkaew, S. Namuangruk, P. Chasinga and V. Promarak, *J. Mater. Chem. C.*, 2021, **9**, 6251-6256.
28. C. Kaiyasuan, P. Chasing, P. Nalaoh, P. Wongkaew, T. Suayoadsuk, K. Kongpatpanich and V. Promarak, *Chem. Asian. J.*, 2021, **16**, 2328-2337.
29. J. Wang, X. Zhai, C. Ji, M. Zhang, C. Yao, G. Xie, J. Zhang and X. Xi, *Dyes. Pigments.*, 2023, **219**, 111586.
30. C. Du, H. Liu, Z. Cheng, S. Zhang, Z. Qu, D. Yang, X. Qiao, Z. Zhao and P. Lu, *Adv. Funct. Mater.*, 2023, **33**, 2304854.
40. M. Xie, T. Li, C. Liu, C. Ma, S. Zhang, G. Liu, Q. Sun, S. T. Zhang, W. Yang and S. Xue, *Chem. Eng. J.*, 2023, **472**, 144950.

**Table S2.** The summary of the key EL performance for white devices W5-W8.

| <b>Devices</b> | <b>V<sub>on</sub><sup>a</sup></b><br><b>(V)</b> | <b>CE<sup>b</sup></b><br><b>(cd/A)</b> | <b>PE<sup>b</sup></b><br><b>(lm/W)</b> | <b>L<sub>max</sub></b><br><b>(cd/m<sup>2</sup>)</b> | <b>CIE<sup>d</sup> (x,y)</b> | <b>CRI<sup>e</sup></b> |
|----------------|-------------------------------------------------|----------------------------------------|----------------------------------------|-----------------------------------------------------|------------------------------|------------------------|
| <b>W1</b>      | 3.5                                             | 0.05                                   | 0.03                                   | 733.5                                               | (0.440,0.426)                | 58/59                  |
| <b>W2</b>      | 3.9                                             | 0.09                                   | 0.04                                   | 1113                                                | (0.426,0.392)                | 60/62                  |
| <b>W3</b>      | 4.2                                             | 0.12                                   | 0.05                                   | 1369                                                | (0.415,0.361)                | 63/66                  |
| <b>W4</b>      | 4.8                                             | 0.13                                   | 0.05                                   | 1379                                                | (0.413,0.346)                | 65/68                  |

<sup>a</sup> Turn-on voltage corresponds to the voltage at a luminance of >1 cd m<sup>-2</sup>;

<sup>b</sup> maximum CE/PE;

<sup>c</sup> CIE coordinates are measured at the voltage of 7 V;

<sup>d</sup> CRI is measured at a voltage of 7 V and 8 V.
